# Supplementary material for: Detecting live bacteria instantly utilizing AIE strategies
Source: Royal Society of Chemistry journal article supplement (doi:10.1039/c8tb01390j), 2018-01-01
Supplement: c8tb01390j1.pdf [file c8tb01390j1.pdf]

## Detecting Live Bacteria Instantly by Utilizing AIE Strategies

Ting Ting Kong<sup>ab</sup>, Zheng Zhao<sup>b</sup>, Ying Li<sup>b</sup>, Fei Wu<sup>a</sup>, Tuo Jin<sup>\*a</sup> and Ben Zhong Tang<sup>\*b</sup>

<sup>a</sup>School of Pharmacy, Shanghai Jiao Tong University, Shanghai 200240, China

<sup>b</sup>Department of Chemistry, Institute of Molecular Functional Materials, The Hong Kong University of Science and Technology, Clear Water Bay, Kowloon, Hong Kong, China.

### Table of Contents

**Figure S1:** <sup>1</sup>H NMR of compound **1**.

(S2)

**Figure S2:** <sup>13</sup>C NMR of compound **1**.

(S2)

**Figure S3:** HRMS of compound **1**.

(S3)

**Figure S4:** <sup>1</sup>H NMR of compound TriPE-3BA.

(S3)

**Figure S5:** <sup>13</sup>C NMR of compound TriPE-3BA.

(S4)

**Figure S6:** HRMS of compound TriPE-3BA.

(S4)

**Figure S7:** HRMS of compound TPE-4BA.

(S5)

**Figure S8.** Fluorescence (FL) spectra of TPE-4BA (10 μM) in Britton-Robinson buffers containing 2% V/V DMSO at different pH values.

(S5)

**Figure S9.** Bright-field and Fluorescent images of *E. coli* and *S. epidermidis* without staining with AIEgens. The micrographs were taken under irradiation of UV light.

(S6)

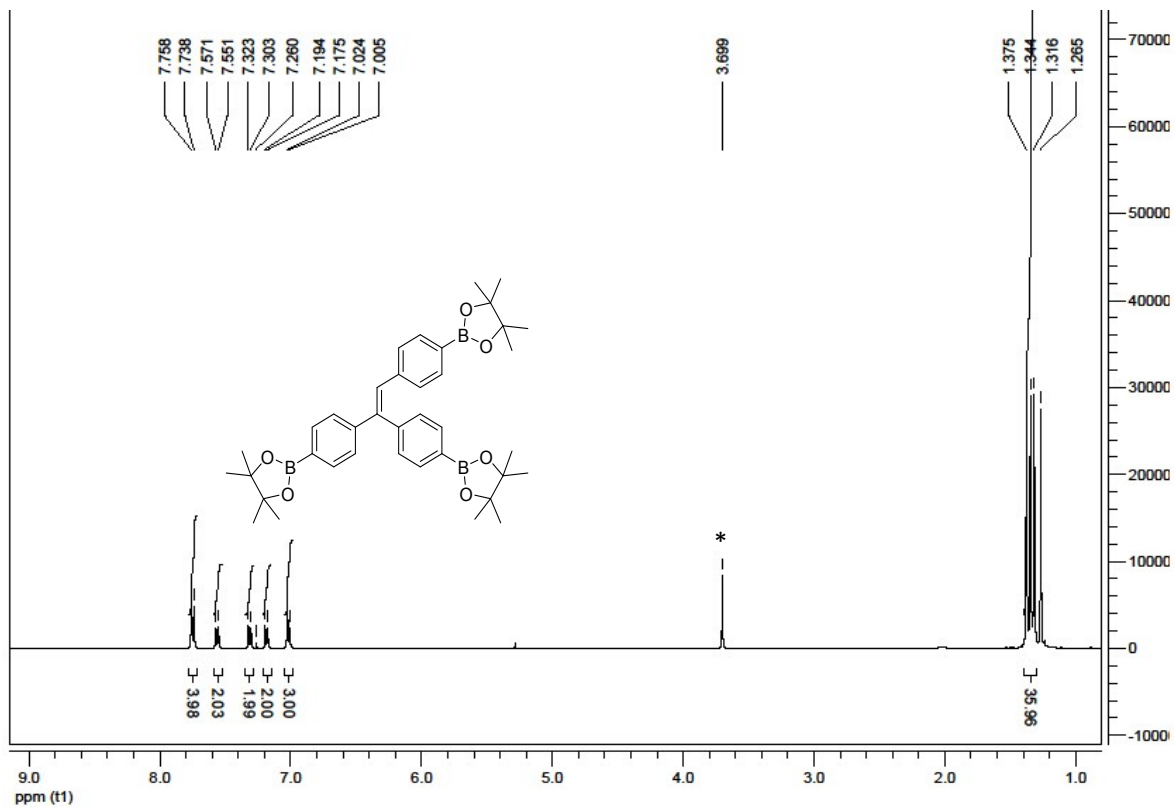

Figure S1:  $^1\text{H}$  NMR of compound 1.

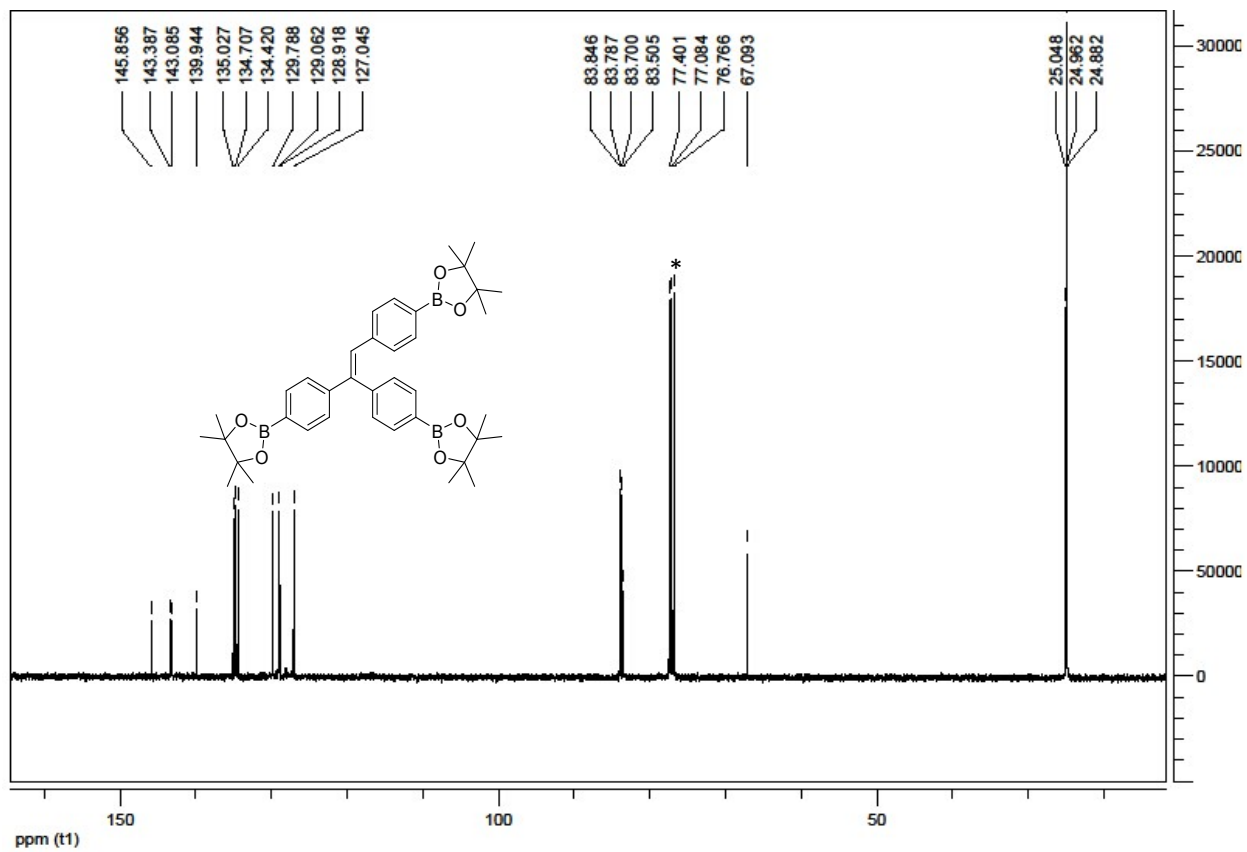

Figure S2.  $^{13}\text{C}$  NMR of compound 1.

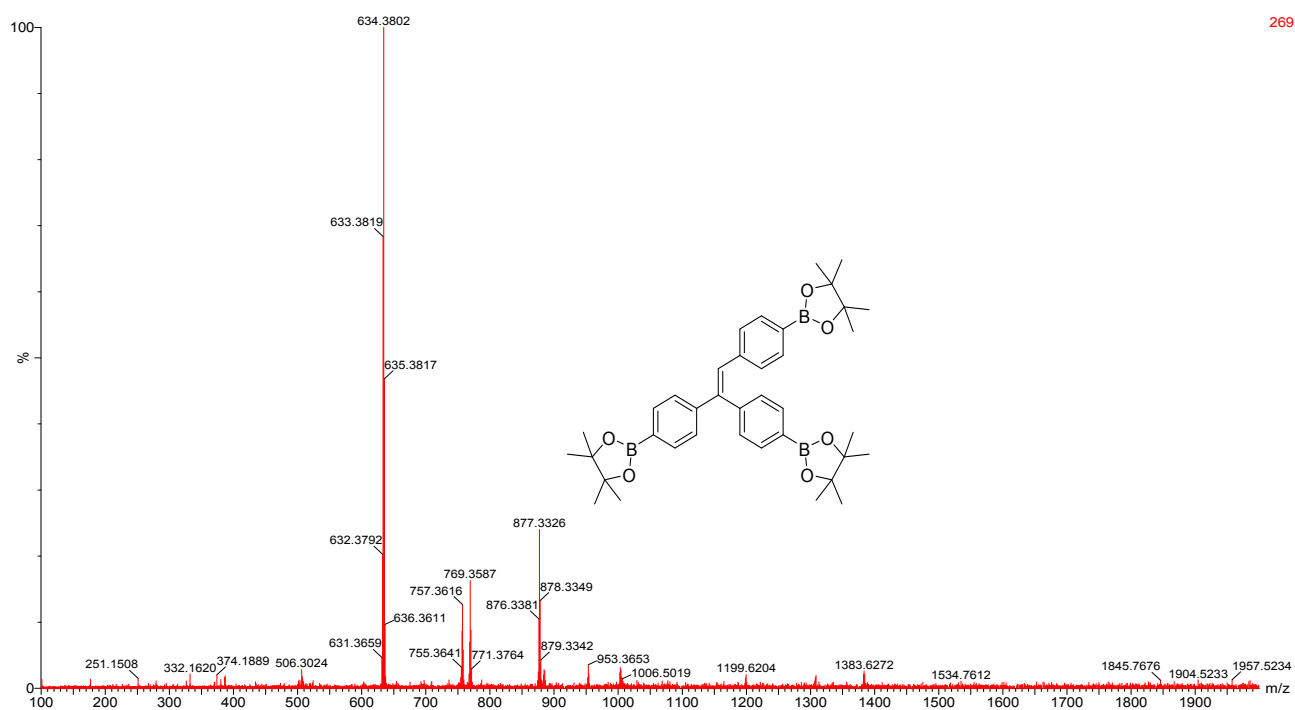

Figure S3. HRMS of compound 1.

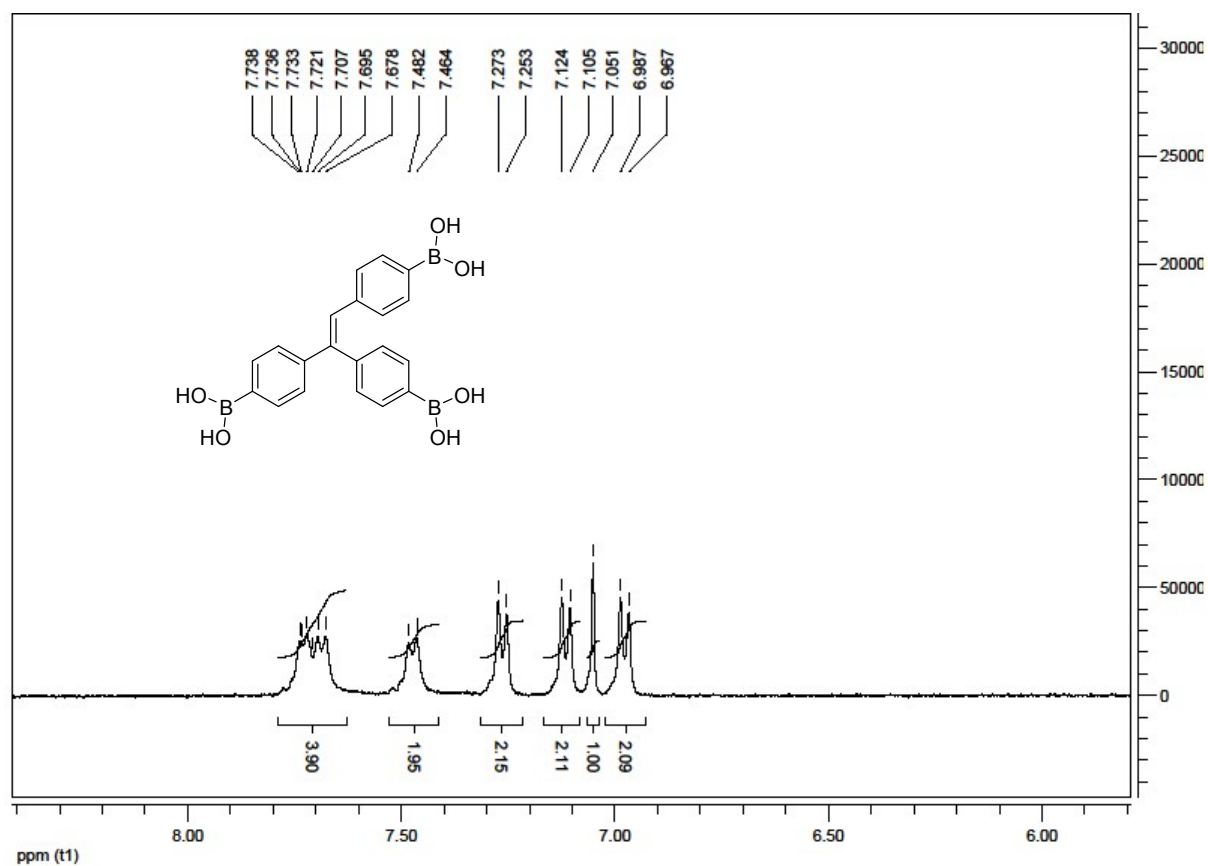

Figure S4.  $^1\text{H}$  NMR of compound TriPE-3BA.

LB019

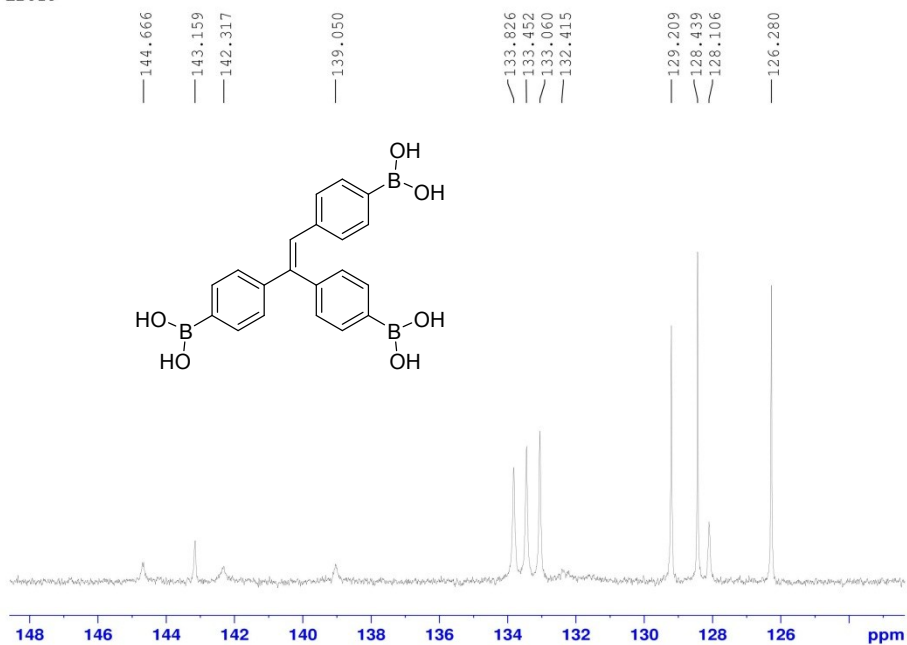

Figure S5.  $^{13}\text{C}$  NMR of compound TriPE-3BA.

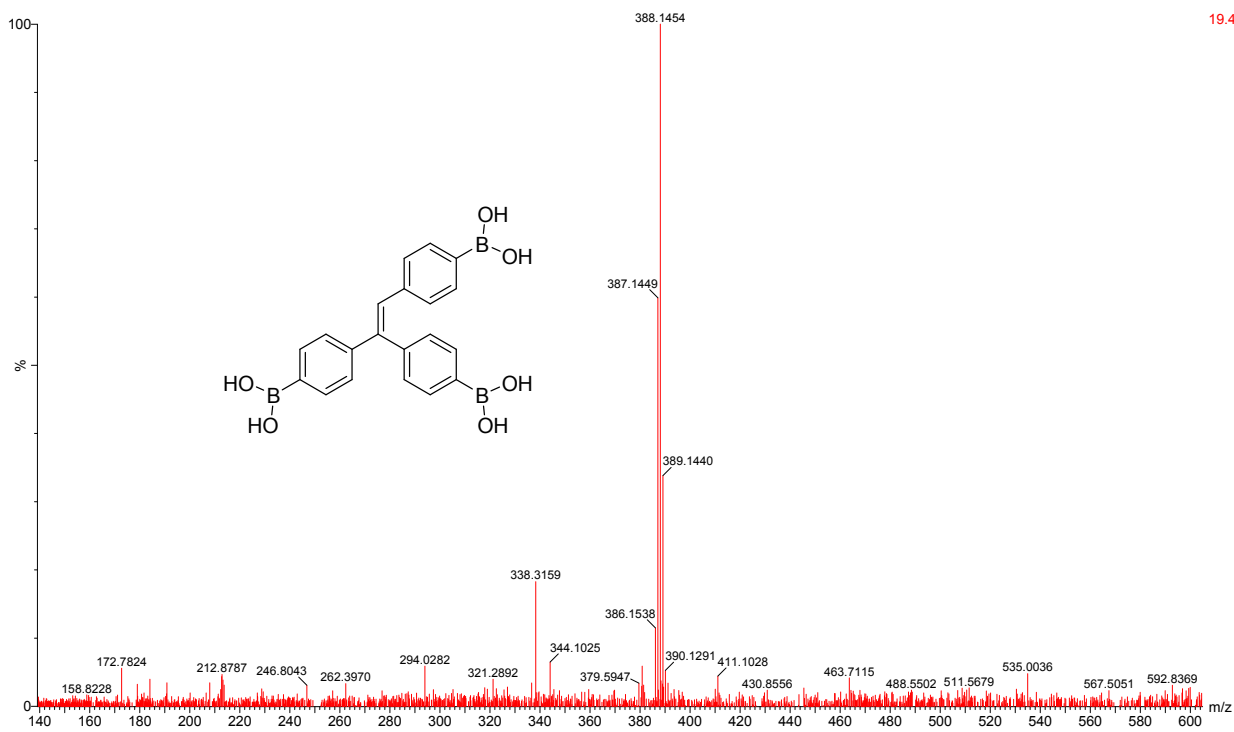

Figure S6. HRMS of compound TriPE-3BA.

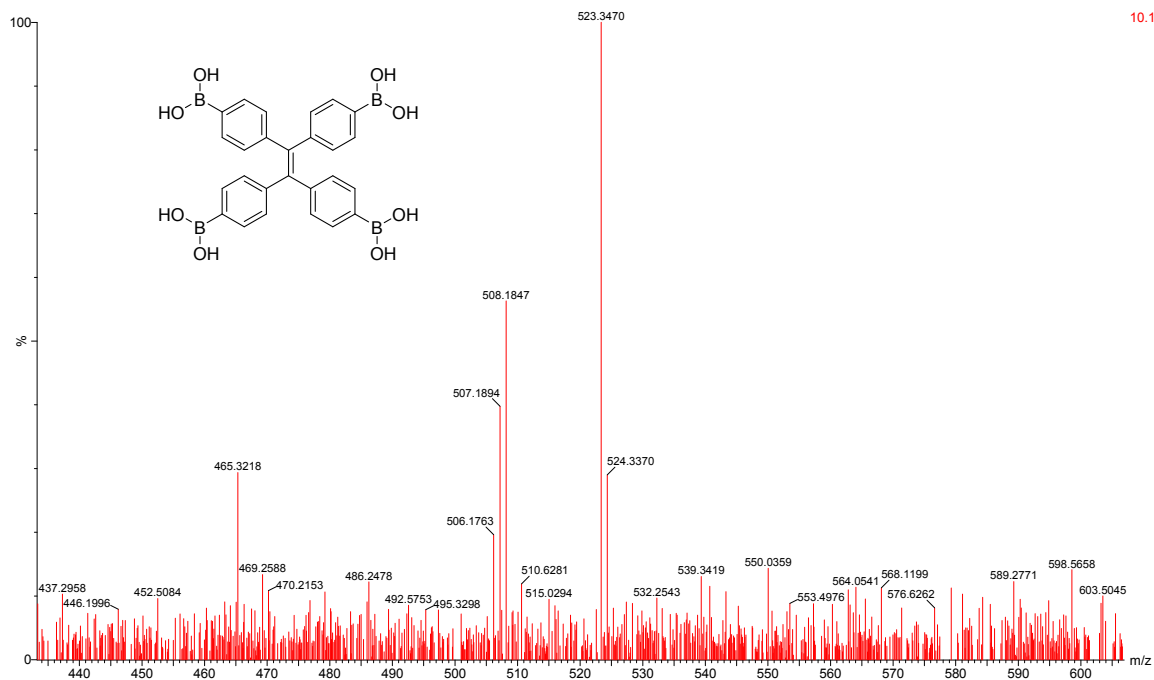

**Figure S7.** HRMS of compound TPE-4BA.

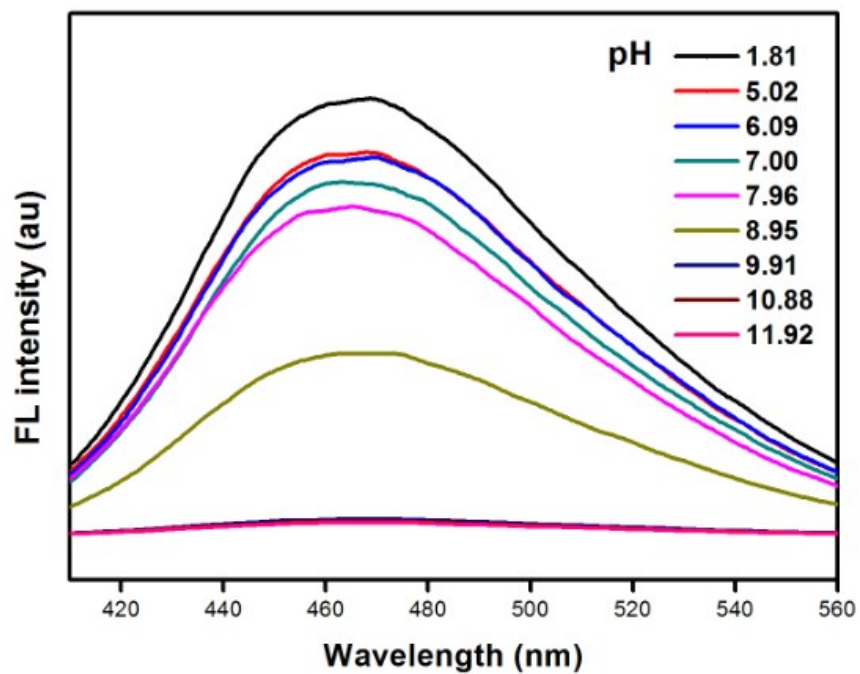

**Figure S8.** Fluorescence (FL) spectra of TPE-4BA (10  $\mu$ M) in Britton-Robinson buffers containing 2% V/V DMSO at different pH values.

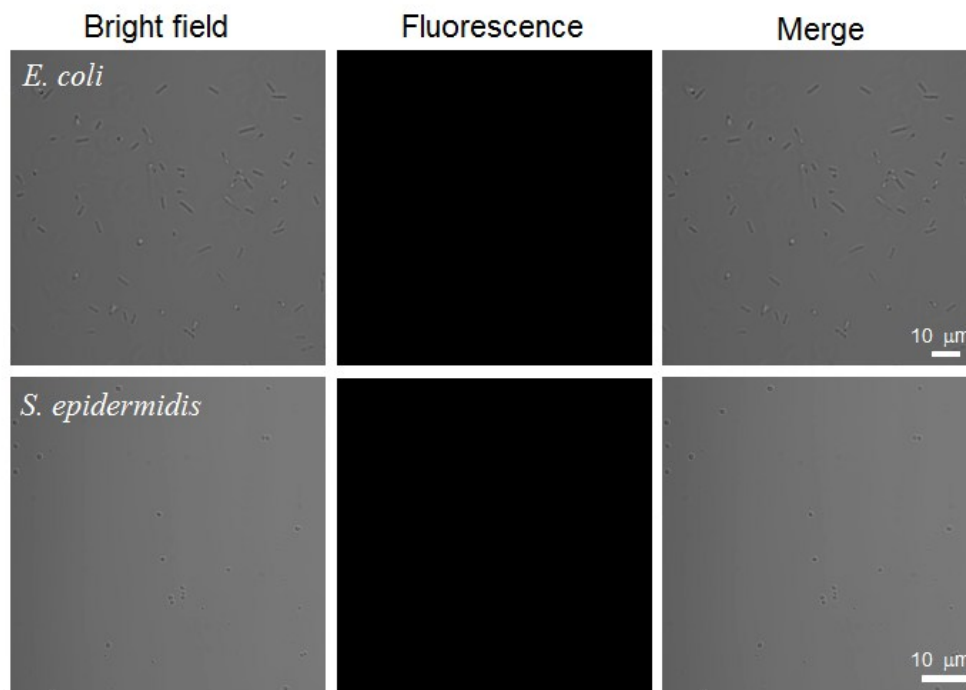

**Figure S9.** Bright-field and Fluorescent images of *E. coli* and *S. epidermidis* without staining with AIEgens. The micrographs were taken under irradiation of UV light.
